# Supplementary material for: Maximal surgical resection and adjuvant surgical technique to prolong the survival of adult patients with thalamic glioblastoma
Source: PLoS One. 2021 Feb 4;16(2):e0244325. doi: 10.1371/journal.pone.0244325 (PMC7861362; doi:10.1371/journal.pone.0244325)
Supplement: S1 Table — (PDF) [file pone.0244325.s001.pdf]

| S1 Clinical information of participants |     |     |                 |              |                 |                        |                 |                      |                           |                                |                                                       |                                                 |                      |                                                 |                                                |                                                   |                            |                          |          |     |           |      |                |           |
|-----------------------------------------|-----|-----|-----------------|--------------|-----------------|------------------------|-----------------|----------------------|---------------------------|--------------------------------|-------------------------------------------------------|-------------------------------------------------|----------------------|-------------------------------------------------|------------------------------------------------|---------------------------------------------------|----------------------------|--------------------------|----------|-----|-----------|------|----------------|-----------|
| Patients ID                             | Age | Sex | Treatment*      | Tumor volume | Tumor component | ventricle wall enhance | multiple lesion | brain stem extension | Location                  | Surgical method                | Extent of resection within enhance region by MR image | Extent of resection within T2 Flair by MR image | Preop. language Sx.* | Preop. sensory Sx. (aggrevation after postop.)* | Preop. visual Sx. (aggrevation after postop.)* | Preop. cognitive Sx. (aggrevation after postop.)* | Motor (change to postop.)* | KPS (change to postop.)* | OS time* | OS* | PFS time* | PFS* | MGMT status    | Ki 67 (%) |
| 1                                       | 46  | M   | Surgery         | 22.61        | Solid & cystic  | No                     | No              | No                   | Anterior                  | Transcortical                  | STR                                                   | STR                                             | No                   | No (No)                                         | No (No)                                        | No (No)                                           | 4 (+1)                     | 80 (+10)                 | 704      | 1   | 610       | 1    | Un-methylation | 17        |
| 2                                       | 45  | M   | Surgery         | 8.24         | Solid & cystic  | No                     | No              | No                   | Anterior                  | MLSO                           | GTR                                                   | STR                                             | No                   | No (No)                                         | No (No)                                        | No (No)                                           | 5 (-1)                     | 90 (-10)                 | 455      | 1   | 286       | 1    | Un-methylation | 14        |
| 3                                       | 52  | F   | Surgery         | 5.32         | Solid & cystic  | No                     | No              | Yes                  | Medial posteior inferior  | Occipital transtentorial       | GTR                                                   | STR                                             | No                   | Yes (Yes)                                       | Yes (No)                                       | Yes (No)                                          | 4 (+1)                     | 70 (+10)                 | 1469     | 0   | 1469      | 0    | Methylation    | 18        |
| 4                                       | 60  | F   | Surgery         | 27.3         | Solid           | No                     | No              | Yes                  | Medial                    | Interhemispheric transcallosal | GTR                                                   | STR                                             | No                   | Yes (No)                                        | No (No)                                        | No (-1)                                           | 4 (-1)                     | 80 (-10)                 | 369      | 1   | 238       | 1    | Un-methylation | 10        |
| 5                                       | 20  | M   | Surgery         | 23.2         | Solid & cystic  | No                     | No              | Yes                  | Medial                    | Interhemispheric transcallosal | STR                                                   | STR                                             | No                   | No (No)                                         | Yes (Yes)                                      | Yes (Yes)                                         | 4 (-1)                     | 70 (-10)                 | 654      | 1   | 460       | 1    | Methylation    | 5         |
| 6                                       | 27  | M   | Surgery         | 15.9         | Solid & cystic  | No                     | No              | Yes                  | Medial posteior inferior  | Occipital transtentorial       | STR                                                   | STR                                             | No                   | No (No)                                         | No (No)                                        | Yes (No)                                          | 4 (+0)                     | 70 (+0)                  | 272      | 1   | 175       | 1    | Methylation    | 15        |
| 7                                       | 30  | M   | Surgery         | 17.2         | Solid           | No                     | No              | No                   | Lateral                   | Transsylvian-transinsular      | GTR                                                   | STR                                             | No                   | Yes (Yes)                                       | No (No)                                        | Yes (Yes)                                         | 3 (+0)                     | 60 (+0)                  | 988      | 1   | 888       | 1    | Un-methylation | 21        |
| 8                                       | 68  | M   | Surgery         | 6.87         | Solid & cystic  | No                     | No              | No                   | Lateral                   | Transcortical                  | GTR                                                   | STR                                             | No                   | No (No)                                         | Yes (Yes)                                      | No (No)                                           | 5 (+0)                     | 80 (+20)                 | 1515     | 0   | 1515      | 0    | Methylation    | 8         |
| 9                                       | 41  | M   | Surgery         | 19.96        | Solid           | No                     | No              | Yes                  | Lateral posteior inferior | Transcortical transventricular | STR                                                   | STR                                             | No                   | No (Yes)                                        | No (No)                                        | No (No)                                           | 4 (+1)                     | 80 (+10)                 | 2705     | 1   | 1907      | 1    | Un-methylation | 11        |
| 10                                      | 20  | M   | Surgery         | 36.52        | Solid & cystic  | No                     | No              | Yes                  | Posterosuperior           | Transcortical transventricular | GTR                                                   | STR                                             | No                   | Yes (No)                                        | No (No)                                        | Yes (No)                                          | 2 (+1)                     | 60 (+10)                 | 99       | 1   | 73        | 1    | Methylation    | 21        |
| 11                                      | 29  | F   | Surgery         | 31.27        | Solid & cystic  | No                     | No              | Yes                  | Lateral posteior inferior | Transcortical transventricular | GTR                                                   | STR                                             | No                   | No (No)                                         | No (No)                                        | Yes (No)                                          | 4 (+0)                     | 70 (+10)                 | 251      | 1   | 148       | 1    | Methylation    | 35        |
| 12                                      | 36  | M   | Surgery         | 29.94        | Solid           | No                     | No              | Yes                  | Lateral posteior inferior | Transcortical transventricular | PR                                                    | PR                                              | Yes                  | No (Yes)                                        | No (No)                                        | Yes (No)                                          | 4 (+0)                     | 70 (+0)                  | 195      | 1   | 127       | 1    | Un-methylation | 18        |
| 13                                      | 45  | M   | Surgery         | 22.4         | Solid           | No                     | No              | No                   | Lateral posteior inferior | Transcortical transventricular | GTR                                                   | STR                                             | No                   | No (No)                                         | No (No)                                        | No (Yes)                                          | 4 (-1)                     | 80 (-10)                 | 1242     | 1   | 328       | 1    | Methylation    | 19        |
| 14                                      | 36  | M   | Surgery         | 68.21        | Solid & cystic  | No                     | No              | Yes                  | Lateral posteior inferior | Transcortical transventricular | GTR                                                   | STR                                             | No                   | Yes (No)                                        | Yes (Yes)                                      | Yes (No)                                          | 3 (+0)                     | 70 (+0)                  | 1532     | 1   | 680       | 1    | Methylation    | 40        |
| 15                                      | 50  | F   | Surgery         | 25.1         | Solid           | No                     | No              | No                   | Lateral                   | Transcortical                  | GTR                                                   | STR                                             | No                   | No (No)                                         | No (No)                                        | No (No)                                           | 4 (+0)                     | 80 (+0)                  | 810      | 1   | 573       | 1    | Un-methylation | 21        |
| 16                                      | 56  | F   | Surgery         | 65.41        | Solid & cystic  | No                     | No              | Yes                  | Lateral posteior inferior | Transcortical                  | STR                                                   | STR                                             | No                   | Yes (Yes)                                       | Yes (Yes)                                      | Yes (Yes)                                         | 3 (-2)                     | 70 (-30)                 | 71       | 1   | 57        | 1    | Un-methylation | 30        |
| 17                                      | 67  | F   | Surgery         | 36.4         | Solid           | No                     | No              | No                   | Anterior                  | Transcortical                  | GTR                                                   | STR                                             | No                   | No (No)                                         | No (No)                                        | Yes (No)                                          | 4 (+0)                     | 70 (+10)                 | 1270     | 0   | 1270      | 0    | Methylation    | 13        |
| 18                                      | 53  | F   | Surgery         | 21.5         | Solid           | No                     | No              | Yes                  | Posterosuperior           | Interhemispheric transcallosal | STR                                                   | STR                                             | No                   | No (Yes)                                        | No (No)                                        | No (No)                                           | 4 (+0)                     | 70 (-10)                 | 524      | 1   | 270       | 1    | Un-methylation | 29        |
| 19                                      | 21  | F   | Surgery         | 15.9         | Solid & cystic  | No                     | No              | Yes                  | Medial                    | Interhemispheric transcallosal | STR                                                   | STR                                             | No                   | No (No)                                         | No (No)                                        | No (Yes)                                          | 5 (-2)                     | 90 (-20)                 | 676      | 1   | 149       | 1    | Methylation    | 15        |
| 20                                      | 63  | M   | Biopy (Patient) | 62.4         | Solid           | No                     | No              | No                   | Lateral posteior inferior | -                              | -                                                     | -                                               | Yes                  | No (No)                                         | No (No)                                        | Yes (No)                                          | 4 (+0)                     | 60 (+0)                  | 179      | 1   | 124       | 1    | Un-methylation | 32        |
| 21                                      | 39  | M   | Biopy (Patient) | 57.9         | Solid           | No                     | No              | Yes                  | Posterosuperior           | -                              | -                                                     | -                                               | No                   | No (Yes)                                        | No (No)                                        | Yes (No)                                          | 3 (+0)                     | 60 (+0)                  | 235      | 1   | 192       | 1    | Methylation    | 28        |
| 22                                      | 36  | M   | Biopy (Patient) | 11           | Solid           | No                     | No              | No                   | Posterosuperior           | -                              | -                                                     | -                                               | No                   | No (No)                                         | No (No)                                        | No (No)                                           | 4 (+0)                     | 70 (+0)                  | 190      | 1   | 24        | 1    | Un-methylation | 28        |
| 23                                      | 56  | F   | Biopy (Patient) | 21.55        | Solid & cystic  | No                     | No              | No                   | Posterosuperior           | -                              | -                                                     | -                                               | No                   | Yes (No)                                        | No (No)                                        | Yes (No)                                          | 4 (+0)                     | 60 (+0)                  | 406      | 1   | 205       | 1    | Un-methylation | 18        |
| 24                                      | 60  | F   | Biopy (Patient) | 9.97         | Cystic          | No                     | No              | No                   | Posterosuperior           | -                              | -                                                     | -                                               | No                   | No (No)                                         | No (No)                                        | No (No)                                           | 4 (+0)                     | 70 (+0)                  | 607      | 1   | 110       | 1    | Methylation    | 21        |
| 25                                      | 65  | M   | Biopy (Patient) | 30.86        | Solid           | Yes                    | No              | No                   | Medial posteior inferior  | -                              | -                                                     | -                                               | No                   | No (Yes)                                        | No (No)                                        | Yes (Yes)                                         | 4 (+0)                     | 60 (+0)                  | 120      | 1   | 112       | 1    | Un-methylation | 40        |
| 26                                      | 38  | M   | Biopy (Doctor)  | 52.9         | Solid           | Yes                    | No              | No                   | Medial                    | -                              | -                                                     | -                                               | No                   | No (No)                                         | No (No)                                        | Yes (No)                                          | 3 (+0)                     | 50 (+0)                  | 237      | 1   | 134       | 1    | Methylation    | 25        |
| 27                                      | 56  | M   | Biopy (Doctor)  | 18.9         | Solid           | Yes                    | Yes             | No                   | Lateral posteior inferior | -                              | -                                                     | -                                               | No                   | No (No)                                         | No (No)                                        | No (No)                                           | 4 (+0)                     | 70 (+0)                  | 187      | 1   | 117       | 1    | Un-methylation | 35        |
| 28                                      | 42  | M   | Biopy (Doctor)  | 52.6         | Solid & cystic  | Yes                    | No              | No                   | Medial                    | -                              | -                                                     | -                                               | No                   | No (No)                                         | No (No)                                        | Yes (No)                                          | 3 (+0)                     | 60 (+0)                  | 207      | 1   | 168       | 1    | Methylation    | 18        |
| 29                                      | 52  | F   | Biopy (Doctor)  | 48.7         | Solid & cystic  | Yes                    | Yes             | Yes                  | Medial posteior inferior  | -                              | -                                                     | -                                               | Yes                  | Yes (Yes)                                       | Yes (Yes)                                      | Yes (Yes)                                         | 3 (-1)                     | 50 (+0)                  | 109      | 1   | 89        | 1    | Un-methylation | 21        |
| 30                                      | 40  | M   | Biopy (Doctor)  | 37.3         | Solid & cystic  | Yes                    | Yes             | Yes                  | Medial                    | -                              | -                                                     | -                                               | No                   | Yes (No)                                        | No (No)                                        | Yes (No)                                          | 3 (+0)                     | 60 (-10)                 | 202      | 1   | 93        | 1    | Un-methylation | 70        |
| 31                                      | 41  | F   | Biopy (Doctor)  | 20.6         | Solid & cystic  | Yes                    | No              | No                   | Anterior                  | -                              | -                                                     | -                                               | No                   | No (No)                                         | No (No)                                        | Yes (No)                                          | 4 (+0)                     | 50 (+0)                  | 309      | 1   | 118       | 1    | Un-methylation | 45        |
| 32                                      | 65  | M   | Biopy (Doctor)  | 39.3         | Solid           | No                     | Yes             | Yes                  | Lateral posteior inferior | -                              | -                                                     | -                                               | No                   | No (Yes)                                        | No (No)                                        | No (Yes)                                          | 4 (-1)                     | 60 (+0)                  | 190      | 1   | 97        | 1    | Un-methylation | 15        |
| 33                                      | 57  | F   | Biopy (Doctor)  | 16.8         | Solid           | Yes                    | No              | No                   | Posterosuperior           | -                              | -                                                     | -                                               | No                   | Yes (No)                                        | No (No)                                        | No (No)                                           | 4 (+0)                     | 70 (+0)                  | 280      | 1   | 54        | 1    | Un-methylation | 22        |
| 34                                      | 42  | F   | Biopy (Doctor)  | 31.1         | Solid & cystic  | Yes                    | No              | Yes                  | Medial posteior inferior  | -                              | -                                                     | -                                               | No                   | Yes (Yes)                                       | Yes (No)                                       | Yes (Yes)                                         | 3 (-1)                     | 50 (+0)                  | 253      | 1   | 135       | 1    | Un-methylation | 31        |
| 35                                      | 54  | F   | Biopy (Doctor)  | 38.08        | Solid & cystic  | Yes                    | No              | No                   | Lateral posteior inferior | -                              | -                                                     | -                                               | No                   | No (Yes)                                        | Yes (Yes)                                      | Yes (No)                                          | 4 (-1)                     | 60 (+0)                  | 339      | 1   | 238       | 1    | Methylation    | 23        |
| 36                                      | 58  | F   | Biopy (Doctor)  | 37.82        | Solid           | Yes                    | No              | No                   | Posterosuperior           | -                              | -                                                     | -                                               | No                   | No (No)                                         | No (Yes)                                       | No (No)                                           | 4 (+0)                     | 70 (-10)                 | 240      | 1   | 193       | 1    | Un-methylation | 25        |
| 37                                      | 55  | M   | Biopy (Doctor)  | 43.96        | Solid & cystic  | Yes                    | No              | Yes                  | Lateral                   | -                              | -                                                     | -                                               | Yes                  | Yes (No)                                        | No (Yes)                                       | Yes (No)                                          | 4 (+0)                     | 60 (+0)                  | 248      | 1   | 113       | 1    | Un-methylation | 35        |
| 38                                      | 47  | M   | Biopy (Doctor)  | 33.81        | Solid           | Yes                    | No              | Yes                  | Posterosuperior           | -                              | -                                                     | -                                               | No                   | No (No)                                         | No (Yes)                                       | No (No)                                           | 4 (+0)                     | 70 (-10)                 | 461      | 1   | 327       | 1    | Methylation    | 40        |
| 39                                      | 23  | M   | Biopy (Doctor)  | 9.85         | Solid           | No                     | Yes             | Yes                  | Medial                    | -                              | -                                                     | -                                               | No                   | Yes (No)                                        | No (Yes)                                       | Yes (Yes)                                         | 3 (+0)                     | 60 (+0)                  | 317      | 1   | 191       | 1    | Un-methylation | 23        |
| 40                                      | 63  | M   | Biopy (Doctor)  | 20.5         | Solid           | Yes                    | No              | Yes                  | Medial posteior inferior  | -                              | -                                                     | -                                               | No                   | No (No)                                         | No (Yes)                                       | Yes (No)                                          | 3 (+0)                     | 50 (+0)                  | 223      | 1   | 171       | 1    | Un-methylation | 17        |
| 41                                      | 58  | F   | Biopy (Doctor)  | 20.86        | Solid & cystic  | Yes                    | Yes             | No                   | Medial posteior inferior  | -                              | -                                                     | -                                               | No                   | No (No)                                         | Yes (Yes)                                      | Yes (No)                                          | 3 (+0)                     | 60 (+0)                  | 243      | 1   | 165       | 1    | Methylation    | 15        |
| 42                                      | 54  | M   | Biopy (Doctor)  | 22.24        | Solid & cystic  | Yes                    | Yes             | No                   | Anterior                  | -                              | -                                                     | -                                               | No                   | Yes (Yes)                                       | Yes (No)                                       | Yes (Yes)                                         | 3 (-1)                     | 60 (-10)                 | 167      | 1   | 128       | 1    | Un-methylation | 25        |

| Column name                                           | Description                                | Indicate                                                                                  |
|-------------------------------------------------------|--------------------------------------------|-------------------------------------------------------------------------------------------|
| Treatment*                                            | Surgical treatment or biopsy               | Biopsy (Patient); Biopsy by patient request, Biopsy (Doctor); Biopsy by doctor's decision |
| Preop. language Sx.*                                  | Language symptom at preoperation           | -                                                                                         |
| Extent of resection within enhance region by MR image | Corresponding to T1 enhancing region       | GTR; Gross total resection, STR; Sub-total resection, PR; Partial resection               |
| Extent of resection within T2 Flair by MR image       | Corresponding to T2 Flair enhancing region | GTR; Gross total resection, STR; Sub-total resection, PR; Partial resection               |
| Preop. sensory Sx. (aggrevation after postop.)*       | Sensory symptom at preoperation            | -                                                                                         |
| Preop. visual Sx. (aggrevation after postop.)*        | Visual symptom at preoperation             | -                                                                                         |
| Preop. cognitive Sx. (aggrevation after postop.)*     | Cognitive symptom at preoperation          | -                                                                                         |
| Motor (change to postop.)*                            | Preoperative motor symptom score           | -                                                                                         |
| KPS (change to postop.)*                              | Preoperative Karnofsky performance status  | -                                                                                         |
| OS time*                                              | Overall survival time                      | days                                                                                      |
| OS*                                                   | Overall survival                           | 0; Alive, 1; Death                                                                        |
| PFS time*                                             | Progression free survival time             | days                                                                                      |
| PFS*                                                  | Progression free survival                  | 0; Stable, 1; Progression                                                                 |

Postop.; Post-operation
